# Supplementary material
Source: publisher figshare collection journal article supplement (https://acs.figshare.com/ndownloader/files/4638535)
Supplement: Supplementary file 1 [file 4638535]

HEADER
HETATM    1  C     2     2      -0.113   1.635  -2.527
HETATM    2  C     2     2       0.117   1.521  -3.903
HETATM    3  H     2     2       0.318   0.543  -4.321
HETATM    4  C     2     2       0.090   2.615  -4.765
HETATM    5  C     2     2      -0.185   3.864  -4.210
HETATM    6  H     2     2      -0.229   4.739  -4.849
HETATM    7  C     2     2      -0.402   4.019  -2.848
HETATM    8  H     2     2      -0.604   5.006  -2.457
HETATM    9  C     2     2      -0.350   2.916  -1.993
HETATM   10  C     2     2       0.357   2.458  -6.241
HETATM   11  H     2     2       1.326   2.884  -6.516
HETATM   12  H     2     2      -0.401   2.968  -6.839
HETATM   13  H     2     2       0.365   1.408  -6.536
HETATM   14  C     2     2      -0.792   4.283  -0.071
HETATM   15  H     2     2       0.027   4.985  -0.252
HETATM   16  H     2     2      -0.889   4.111   0.997
HETATM   17  H     2     2      -1.724   4.700  -0.463
HETATM   18  C     2     2      -0.091  -1.279  -2.613
HETATM   19  C     2     2       0.968  -2.186  -2.669
HETATM   20  H     2     2       1.823  -2.022  -2.022
HETATM   21  C     2     2       0.978  -3.294  -3.521
HETATM   22  C     2     2      -0.139  -3.482  -4.330
HETATM   23  H     2     2      -0.176  -4.330  -5.005
HETATM   24  C     2     2      -1.221  -2.606  -4.296
HETATM   25  H     2     2      -2.069  -2.794  -4.939
HETATM   26  C     2     2      -1.210  -1.504  -3.442
HETATM   27  C     2     2       2.161  -4.227  -3.573
HETATM   28  H     2     2       2.548  -4.441  -2.574
HETATM   29  H     2     2       2.980  -3.793  -4.154
HETATM   30  H     2     2       1.897  -5.176  -4.040
HETATM   31  C     2     2      -3.326  -0.715  -4.271
HETATM   32  H     2     2      -2.985  -0.652  -5.307
HETATM   33  H     2     2      -3.971   0.133  -4.053
HETATM   34  H     2     2      -3.882  -1.644  -4.119
HETATM   35  C     2     2      -0.268   1.370   2.321
HETATM   36  C     2     2       0.880   2.126   2.553
HETATM   37  H     2     2       1.806   1.810   2.088
HETATM   38  C     2     2       0.885   3.261   3.367
HETATM   39  C     2     2      -0.324   3.636   3.946
HETATM   40  H     2     2      -0.365   4.511   4.585
HETATM   41  C     2     2      -1.495   2.914   3.726
HETATM   42  H     2     2      -2.413   3.243   4.193
HETATM   43  C     2     2      -1.480   1.782   2.913
HETATM   44  C     2     2       2.159   4.025   3.628
HETATM   45  H     2     2       2.771   3.523   4.383
HETATM   46  H     2     2       1.951   5.032   3.991
HETATM   47  H     2     2       2.766   4.113   2.724
HETATM   48  C     2     2      -3.816   1.347   3.284
HETATM   49  H     2     2      -3.727   1.300   4.373
HETATM   50  H     2     2      -4.522   0.593   2.947
HETATM   51  H     2     2      -4.171   2.338   2.986
HETATM   52  C     2     2      -0.684  -1.531   2.254
HETATM   53  C     2     2      -0.781  -1.394   3.643
HETATM   54  H     2     2      -0.587  -0.427   4.089
HETATM   55  C     2     2      -1.120  -2.454   4.481
HETATM   56  C     2     2      -1.376  -3.687   3.883
HETATM   57  H     2     2      -1.657  -4.534   4.500
HETATM   58  C     2     2      -1.275  -3.865   2.510
HETATM   59  H     2     2      -1.472  -4.841   2.090
HETATM   60  C     2     2      -0.909  -2.799   1.686
HETATM   61  C     2     2      -1.189  -2.281   5.977
HETATM   62  H     2     2      -2.091  -2.738   6.390
HETATM   63  H     2     2      -1.189  -1.226   6.257
HETATM   64  H     2     2      -0.333  -2.751   6.469
HETATM   65  C     2     2      -0.995  -4.176  -0.276
HETATM   66  H     2     2      -0.311  -4.940   0.104
HETATM   67  H     2     2      -0.816  -4.026  -1.337
HETATM   68  H     2     2      -2.028  -4.498  -0.121
HETATM   69  C     2     2      -2.507   0.218  -0.276
HETATM   70  H     2     2      -2.826  -0.044  -1.280
HETATM   71  H     2     2      -2.812   1.242  -0.053
HETATM   72  H     2     2      -2.987  -0.454   0.435
HETATM   73  N     2     2      -1.053   0.071  -0.188
HETATM   74 NI     2     2       1.842  -0.185   0.097
HETATM   75  O     2     2      -0.517   3.006  -0.644
HETATM   76  O     2     2      -2.230  -0.609  -3.361
HETATM   77  O     2     2      -2.578   1.027   2.650
HETATM   78  O     2     2      -0.751  -2.912   0.340
HETATM   79  P     2     2       0.116   0.151  -1.456
HETATM   80  P     2     2      -0.098  -0.117   1.236
HETATM   81  C     2     2       2.856  -1.124   1.498
HETATM   82  H     2     2       3.798  -1.377   1.000
HETATM   83  H     2     2       2.252  -2.039   1.560
HETATM   84  C     2     2       3.140  -0.581   2.891
HETATM   85  H     2     2       2.205  -0.356   3.411
HETATM   86  H     2     2       3.688   0.365   2.826
HETATM   87  C     2     2       3.956  -1.563   3.745
HETATM   88  H     2     2       4.149  -1.151   4.739
HETATM   89  H     2     2       4.920  -1.784   3.282
HETATM   90  H     2     2       3.423  -2.508   3.871
HETATM   91  C     2     2       3.581   0.984  -0.314
HETATM   92  H     2     2       4.245   0.850   0.528
HETATM   93  H     2     2       3.174   1.981  -0.451
HETATM   94  C     2     2       3.489   0.056  -1.308
HETATM   95  H     2     2       4.056  -0.867  -1.263
HETATM   96  H     2     2       3.053   0.305  -2.266
